# Supplementary material for: Demonstration of the optical limiting effect for an hemiporphyrazine
Source: Royal Society of Chemistry journal article supplement (doi:10.1039/b601591c), 2006-01-01
Supplement: b601591c.pdf [file b601591c.pdf]

**Electronic supplementary information relative to the communication titled *First demonstration of optical limiting effect for an hemiporphyrazine*** (Authors: D. Dini, M.J.F. Calvete, M. Hanack, V. Amendola, M. Meneghetti)

## Experimental Section

### *4-butoxy-2,6-diaminopyridine (2)*

4-butoxy-2,6-diaminopyridine (**2**) was prepared from chelidamic acid following a modified version of the multistep procedure which was reported for the first time by Markees et al. [SI1,SI2].

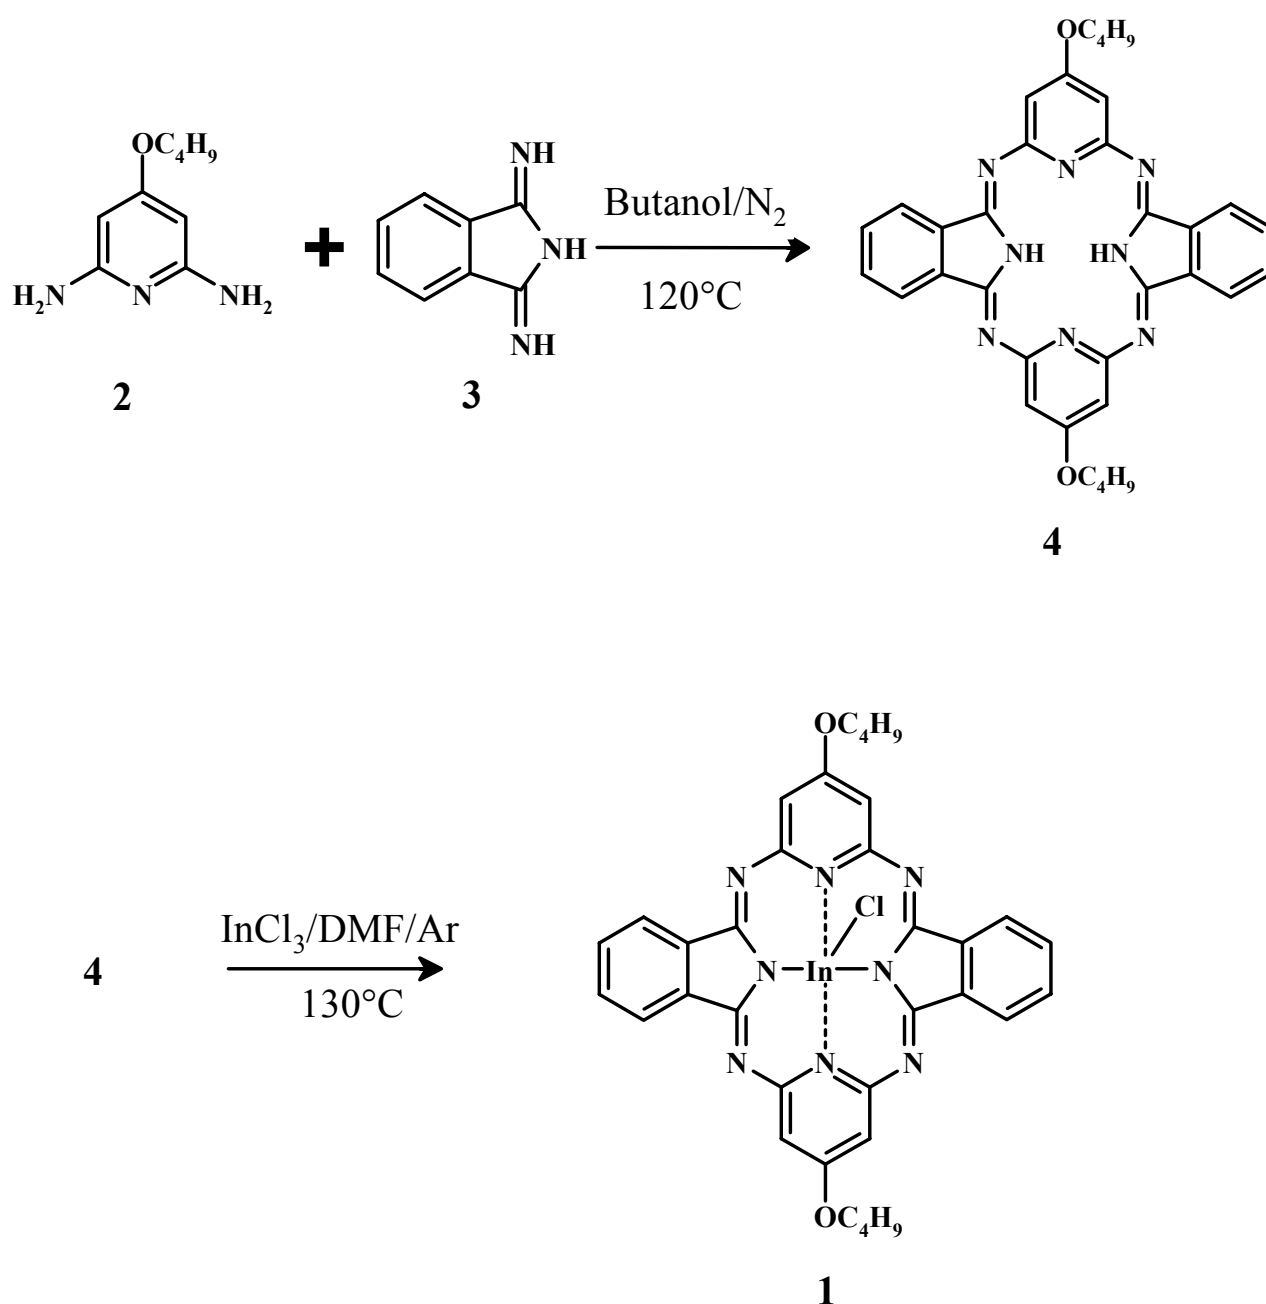

**Scheme 1.** Synthesis of (BuO)<sub>2</sub>HpInCl (**1**).

*9,22-bis-(dibutoxy)hemiporphyrizinato chloro indium (1)*

The hemiporphyrizinato indium chloride complex **1** was obtained by heating 9,22-bis-(dibutoxy)hemiporphyrizine (**4**) [SI1a] with InCl<sub>3</sub> in excess (Scheme 1). A suspension of 290 mg (0.5 mmol) of **4** and 220 mg (1 mmol) of InCl<sub>3</sub> in 3 ml dry DMF was heated at 130 °C for 6 hours. On cooling, water was added to precipitate the mixture. The solid was washed with water and cold methanol to remove DMF traces. After washing the solid was dried at 80°C in vacuum. Yield: 250 mg (0.40 mmol-80 %) yellowish solid. Mass (EI, 70 eV), m/z: 618 [M<sup>+</sup>], 561 [M<sup>+</sup> - C<sub>4</sub>H<sub>9</sub>]. <sup>1</sup>H-NMR (CDCl<sub>3</sub>): 0.96 (t, 6H), 1.47 (m, 4H), 1.73 (m, 4H), 3.95 (t, 4H, OCH<sub>2</sub>), 6.30 (4H, H-6), 7.50 (br, 4H, H-1), 7.70 (br, 4H, H-2). <sup>13</sup>C-NMR (CDCl<sub>3</sub>): 13.70, 19.14, 30.83, 68.08, 107.22, 120.91, 129.39, 137.89, 157.19, 167.49.

*NLO Transmission Measurements*

Nonlinear optical transmission measurements were carried out with 9 ns pulses at 532 nm from a doubled Nd:YAG laser (Quantel YG980E) and at 2 Hz in an open-aperture configuration [SI4]. Transmitted energies were measured pulse by pulse with a pyroelectric detector (Scientech mod. SPHD25) and a calibrated photodiode. When incident intensity is below  $1.0 \cdot 10^{25}$  photons cm<sup>-2</sup> s<sup>-1</sup> scattering of transmission data can take place due to the poor sensitivity of the pyroelectric detector at these values. The intensity of the incident pulses was controlled with a  $\lambda/2$  wave-plate and a polarizing cube beam-splitter. The illuminated area on the sample was 0.050 cm<sup>2</sup>. The measurements were carried out using 2 mm thick glass cells. Experiments were performed with  $1 \cdot 10^{-4}$  M solutions of (BuO)<sub>2</sub>HpInCl (**1**) in toluene ( $\epsilon = 218$  L mol<sup>-1</sup>cm<sup>-1</sup> at 532 nm for **1**). Linear optical spectra have been recorded with a Varian Cary 5 UV-Vis Spectrophotometer.

*Pump and probe experiments*

Pump and probe experiments have been performed on (BuO)<sub>2</sub>HpInCl (**1**) solutions in order to examine the characteristics of the excited state of **1** which is responsible for its nonlinear optical behaviour. The lifetime and the spectral properties of complex **1** have been evaluated through pump and probe experiments with nanosecond laser pulses as pump radiation and probing the kinetics of fast absorption at different wavelengths on a microsecond timescale with nanosecond resolution. A Xenon lamp was used as a source for the probe and 1-GHz digital oscilloscope (LeCroy LC564A) to record the transient signals which were detected by

a Jobin-Yvon Horiba TRIAX 320 spectrometer equipped with an Hamamatsu phototube (R2257).

## References

**SI1.** (a) Hanack M.; Haberroth K.; Rack M. *Chem. Ber.* 1993, **126**, 1201-1204; (b) Haberroth, K.; Rack, M.; Ruff, D.; Hanack, M. *Chem. Ber.* 1995, **128**, 417-421.

**SI2.** (a) Markees, D.G.; Kidder, G.W. *J. Am. Chem. Soc.* 1958, **78**, 4130-4135; (b) Markees, D.G.; Dewey, V.C.; Kidder, G.W. *Arch. Biochem. Biophys.* 1960, **86**, 179-184; (c) Markees, D.G.; Dewey, V.C.; Kidder, G.W. *J. Med. Chem.* 1968, **11**, 126-129; (d) Feibush, B.; Figueroa, A.; Charles, R.; Onan, K.D.; Feibush, P.; Karger, B.L. *J. Am. Chem. Soc.* 1986, **108**, 3310-3318; (e) Tedeschi, R.E.; Weinstock, J. *US Patent* 3.329.569, 1967.

**SI3.** Elvidge, J.A.; Linstead, R.P. *J. Chem. Soc. Abstr.* 1952, 5008-5012.

**SI4.** Dini, D.; Hanack, Meneghetti, M. *J. Phys. Chem. B* 2005, **109**, 12691-12696.
